# Supplementary material
Source: PubMed Central journal article supplement (PMC9718299)

**Animal 1**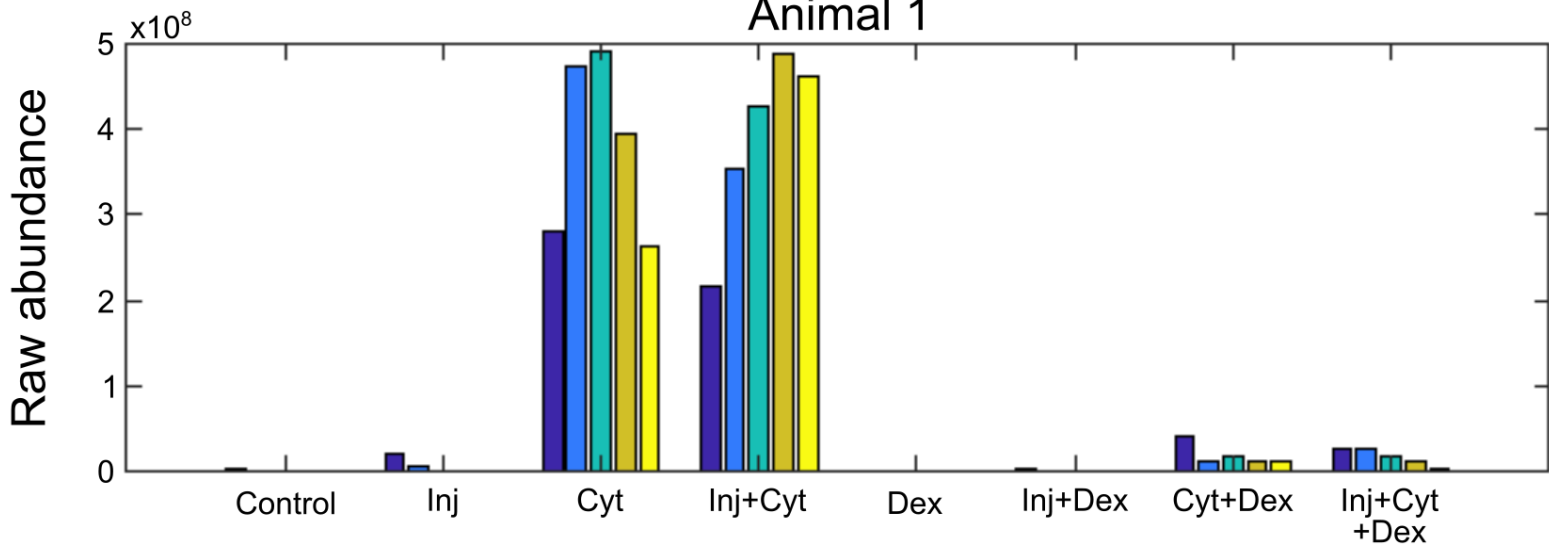**Animal 2**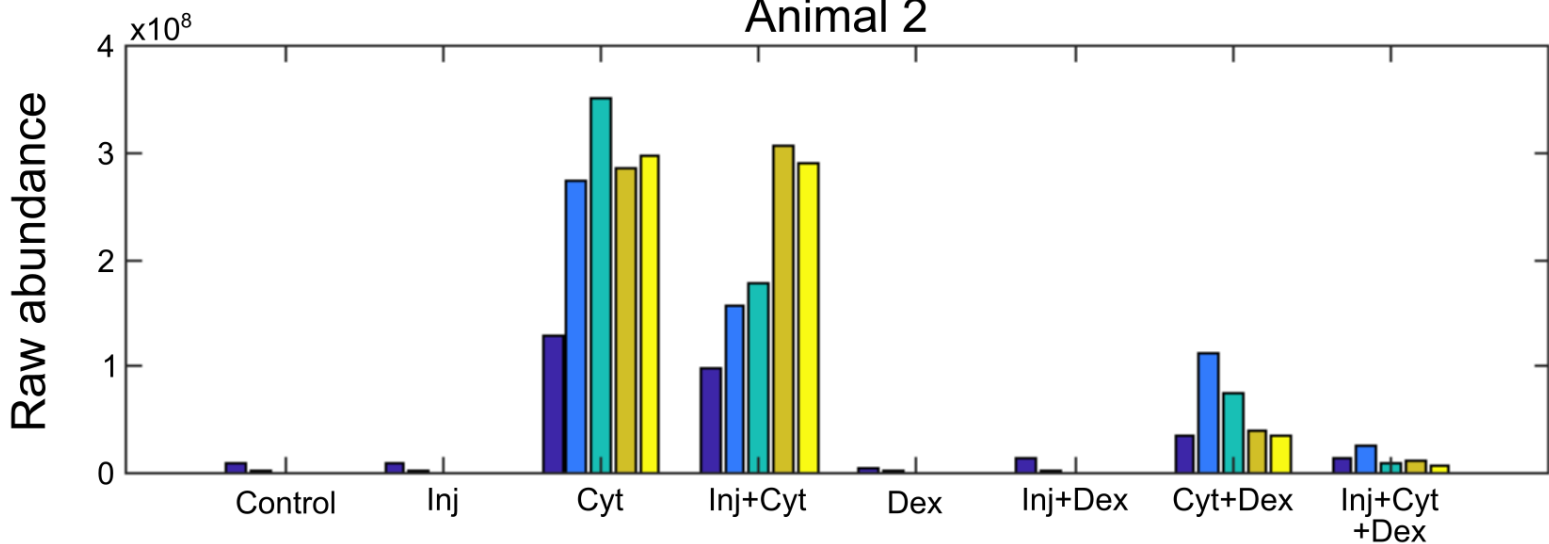**Animal 3**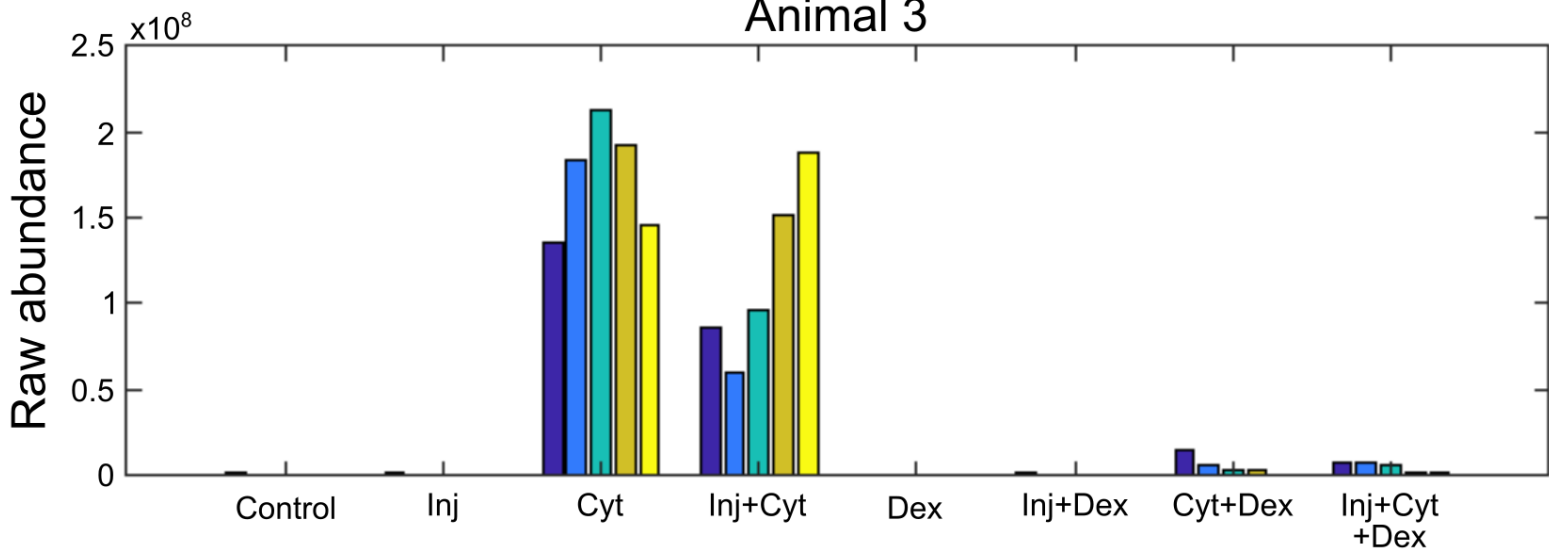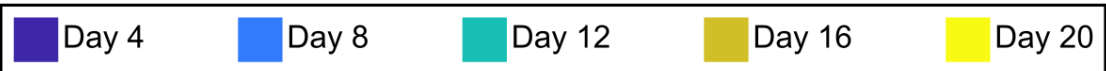

Supplement: mmc6.pdf [file mmc6.pdf]
