# Supplementary material
Source: PubMed Central journal article supplement (PMC9718299)

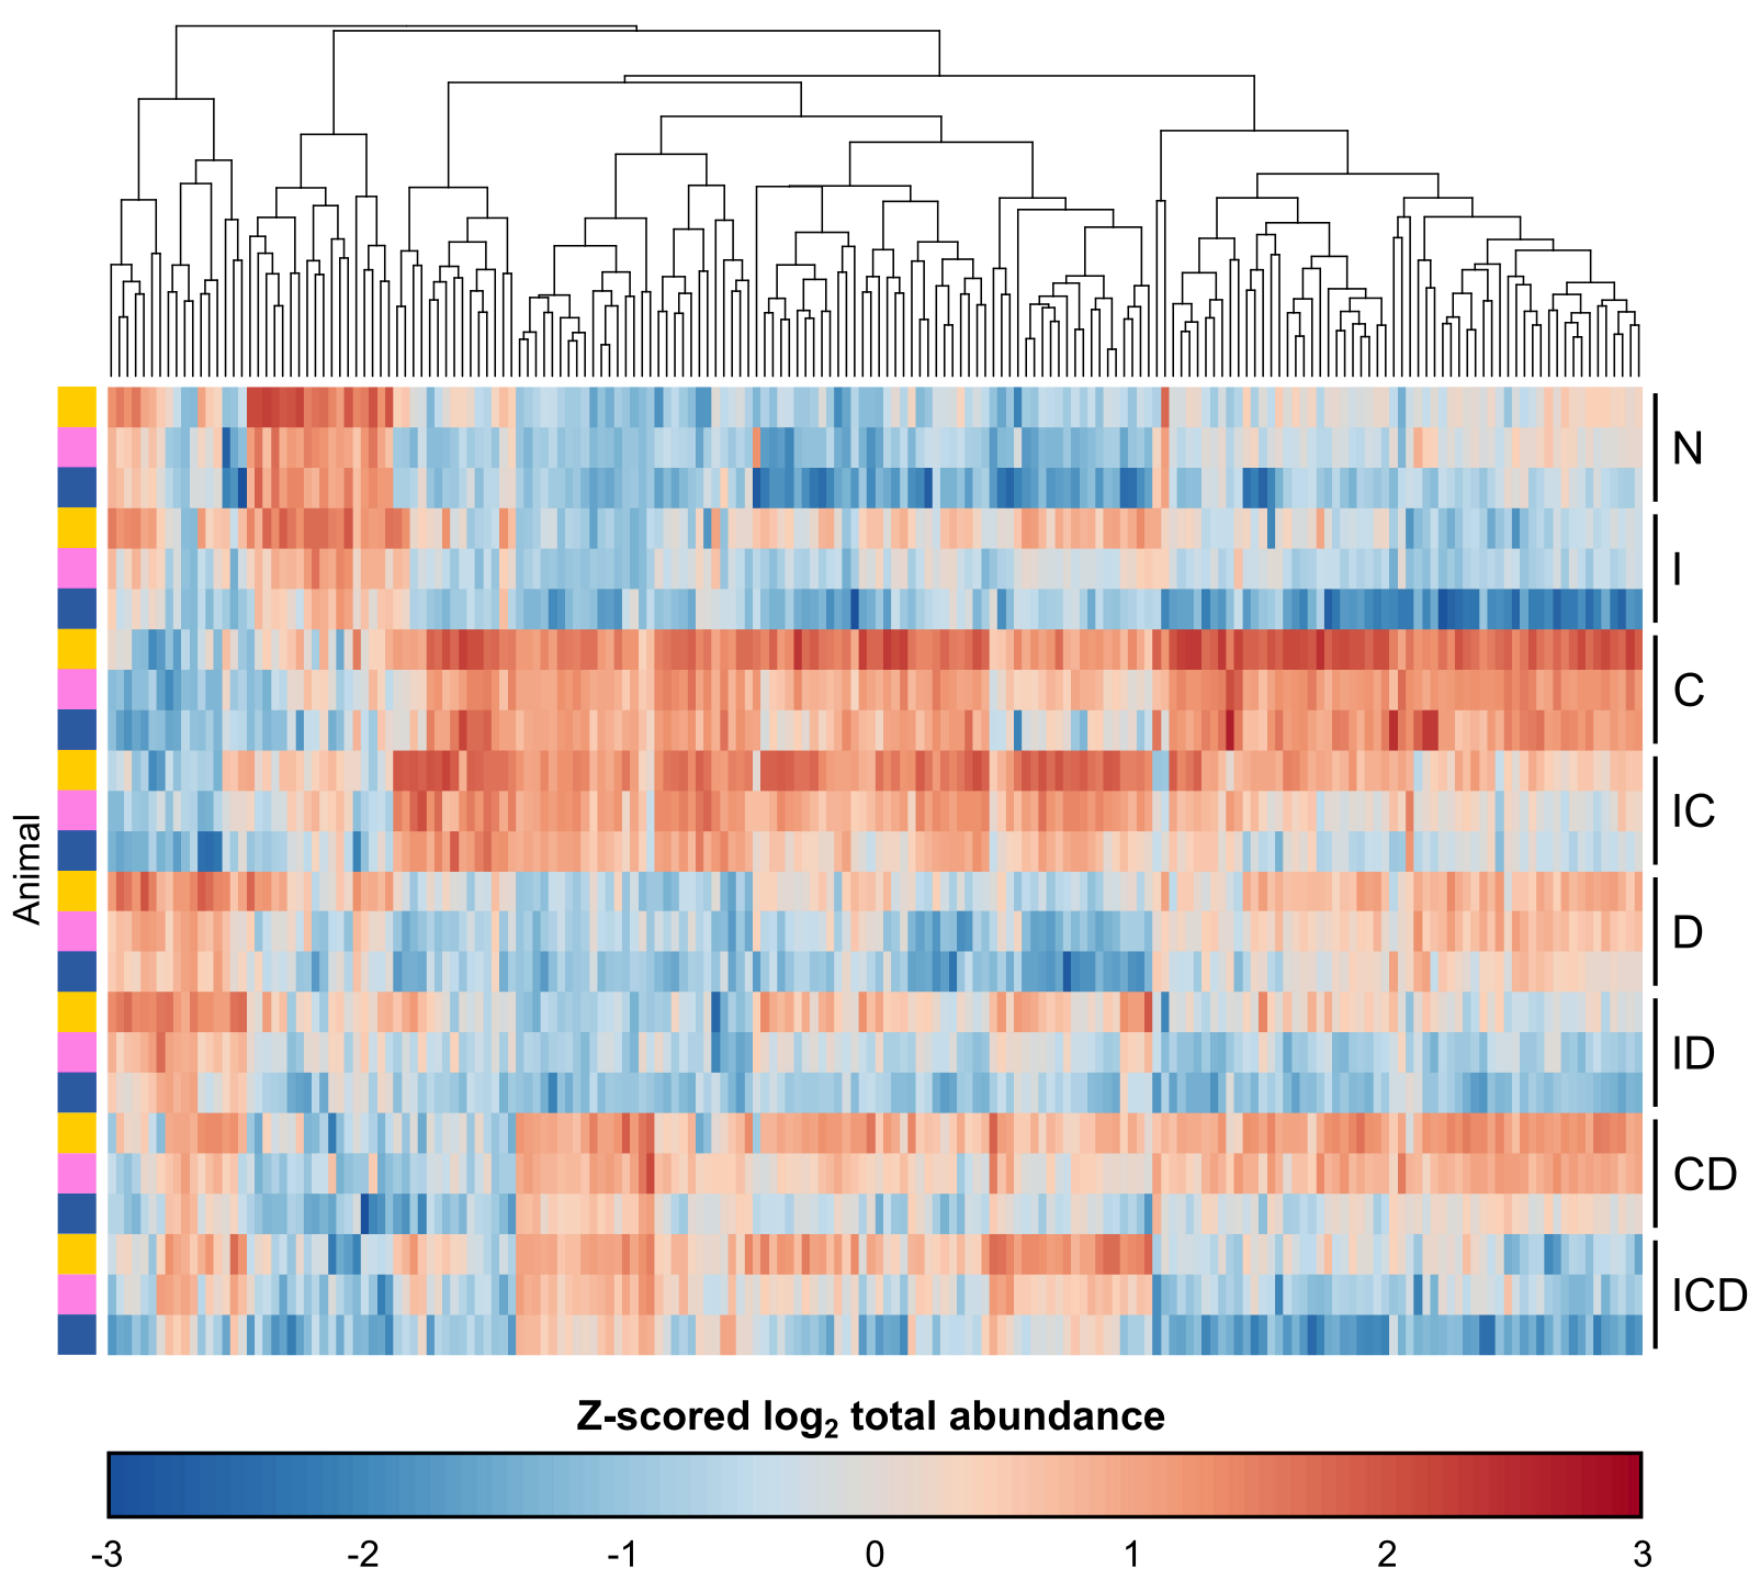

Supplement: mmc8.pdf [file mmc8.pdf]
