# Supplementary material
Source: PubMed Central journal article supplement (PMC9718299)
Supplement: mmc9.pdf [file mmc9.pdf]

Control

4 8 12 16 20 22

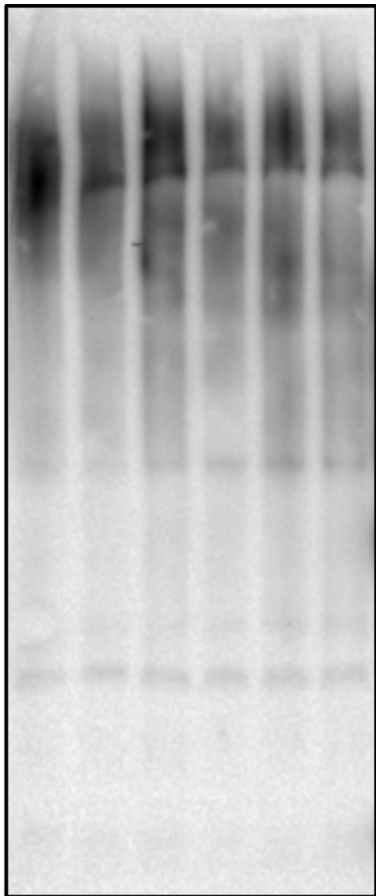

Cyt

2 4 8 12 16 20 22

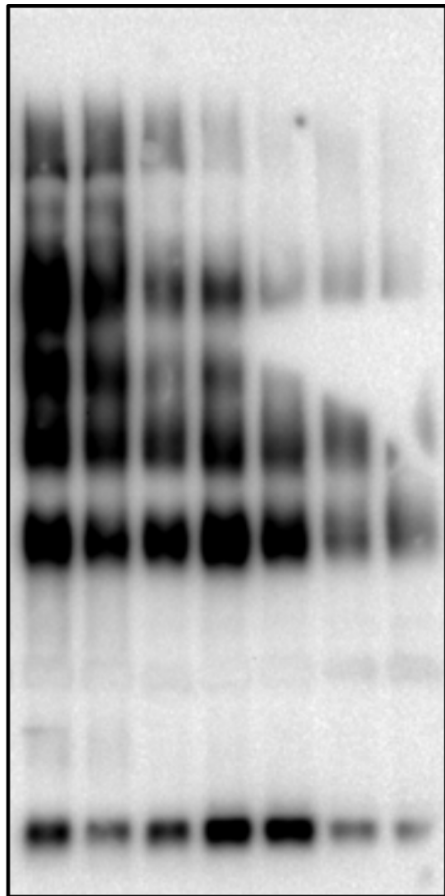

Inj+Cyt

2 4 8 12 16 20 22

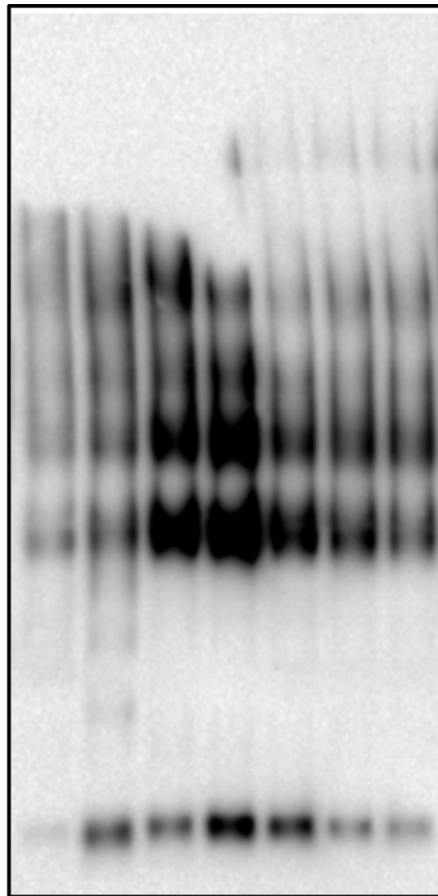

Inj+Cyt+Dex

4 8 12 16 20 22 days

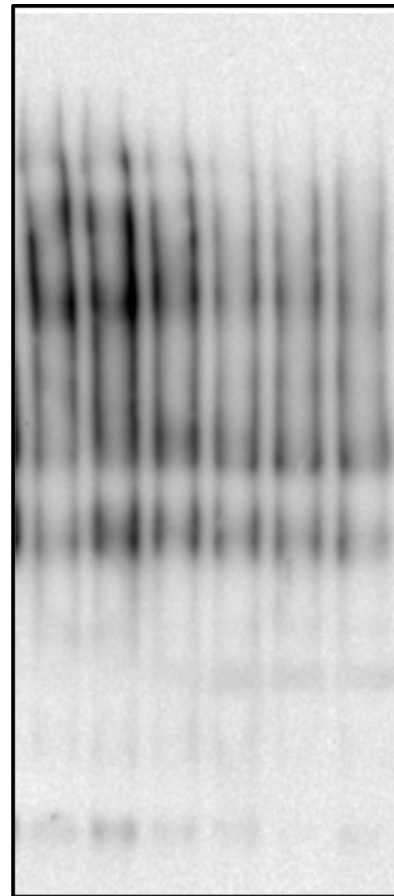

← G1-G3 (>400)

← GRGT-G3 (228)

← GLGS-G3 (182)

← AGE G-G3 (139)

← LGQR-G3 (105)

← ARLE-G3 (38)
