# Supplementary material
Source: PubMed Central journal article supplement (PMC9718299)

## Control

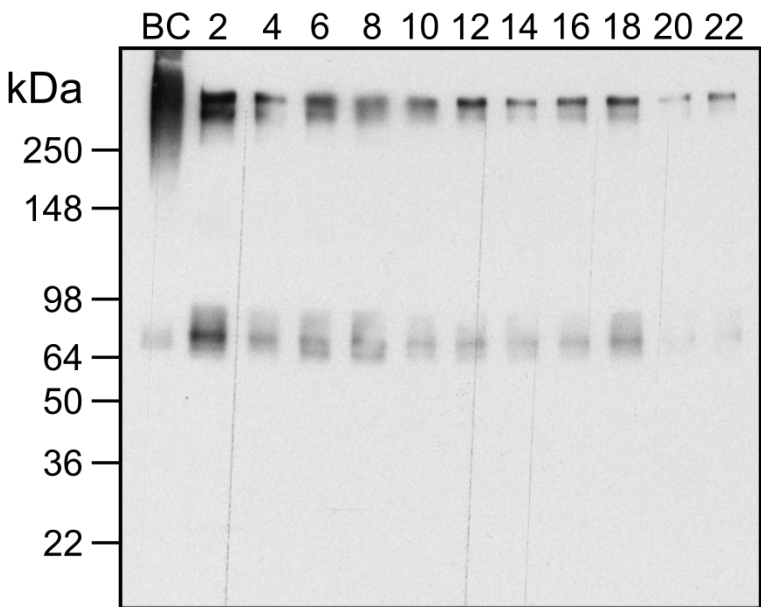

## Inj+Cyt

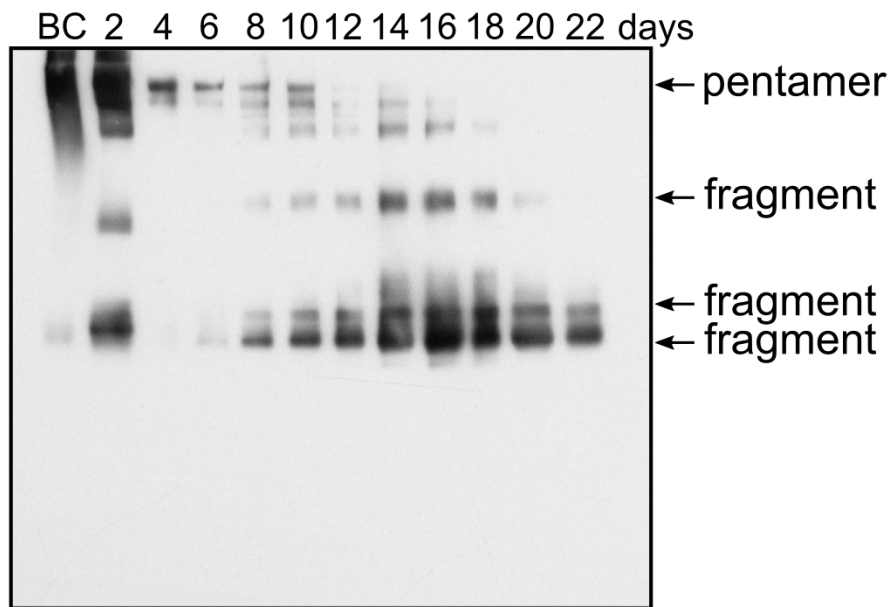

## Inj+Cyt+10% load

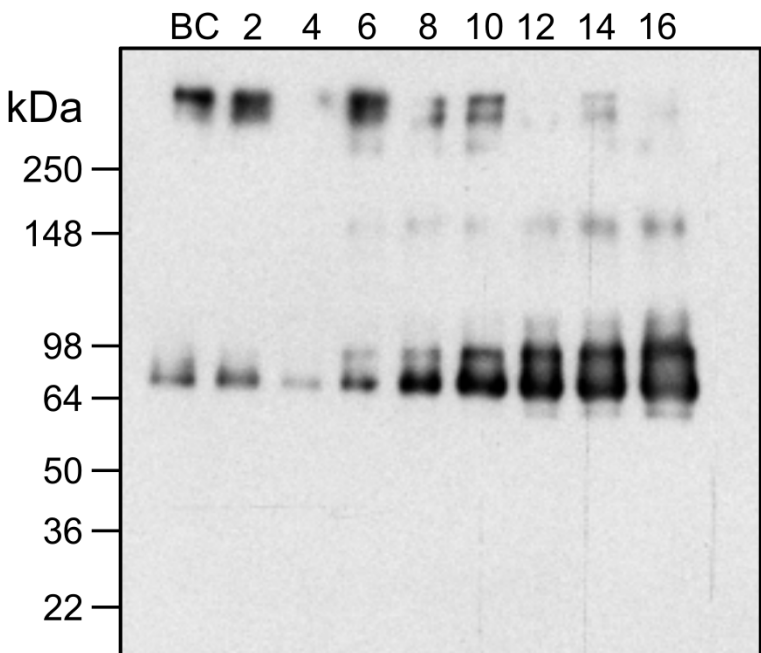

## Inj+Cyt+10% load+Dex

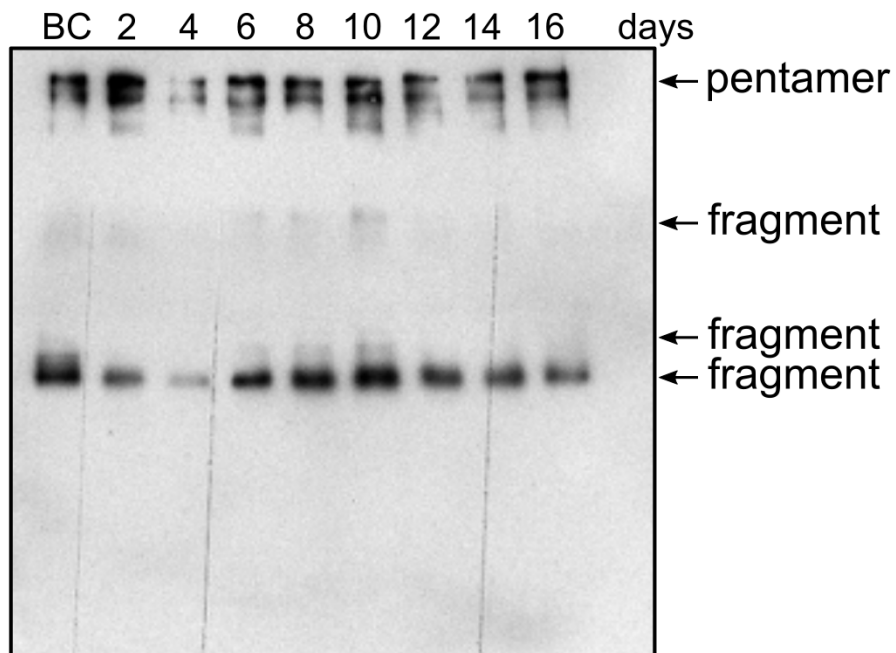

Supplement: mmc10.pdf [file mmc10.pdf]
